# Supplementary material
Source: PubMed Central journal article supplement (PMC3780913)

|             | GPS1_09May | GPS1_09Sep | GPS1_11Oct | NS1_10Apr | BS5_B_09May | BS5_S_09May | BS5_R_09May | BS5_B_09Sep | BS5_B_11Oct |
|-------------|------------|------------|------------|-----------|-------------|-------------|-------------|-------------|-------------|
| GPS1_09Sep  | 0.67       |            |            |           |             |             |             |             |             |
| GPS1_11Oct  | 0.67       | 0.57       |            |           |             |             |             |             |             |
| NS1_10Apr   | 0.54       | 0.52       | 0.44       |           |             |             |             |             |             |
| BS5_B_09May | 0.46       | 0.39       | 0.39       | 0.40      |             |             |             |             |             |
| BS5_S_09May | 0.39       | 0.31       | 0.31       | 0.41      | 0.55        |             |             |             |             |
| BS5_R_09May | 0.20       | 0.19       | 0.10       | 0.43      | 0.35        | 0.40        |             |             |             |
| BS5_B_09Sep | 0.48       | 0.40       | 0.40       | 0.32      | 0.58        | 0.53        | 0.35        |             |             |
| BS5_B_11Oct | 0.43       | 0.42       | 0.37       | 0.30      | 0.55        | 0.51        | 0.28        | 0.58        |             |
| Creek       | 0.06       | 0.09       | 0.06       | 0.09      | 0.10        | 0.08        | 0.06        | 0.11        | 0.09        |

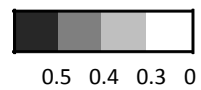

Supplement: 1302426110_sfig03.pdf [file 1302426110_sfig03.pdf]
