# Supplementary material
Source: PubMed Central journal article supplement (PMC3780913)

# A. Chloroflexi

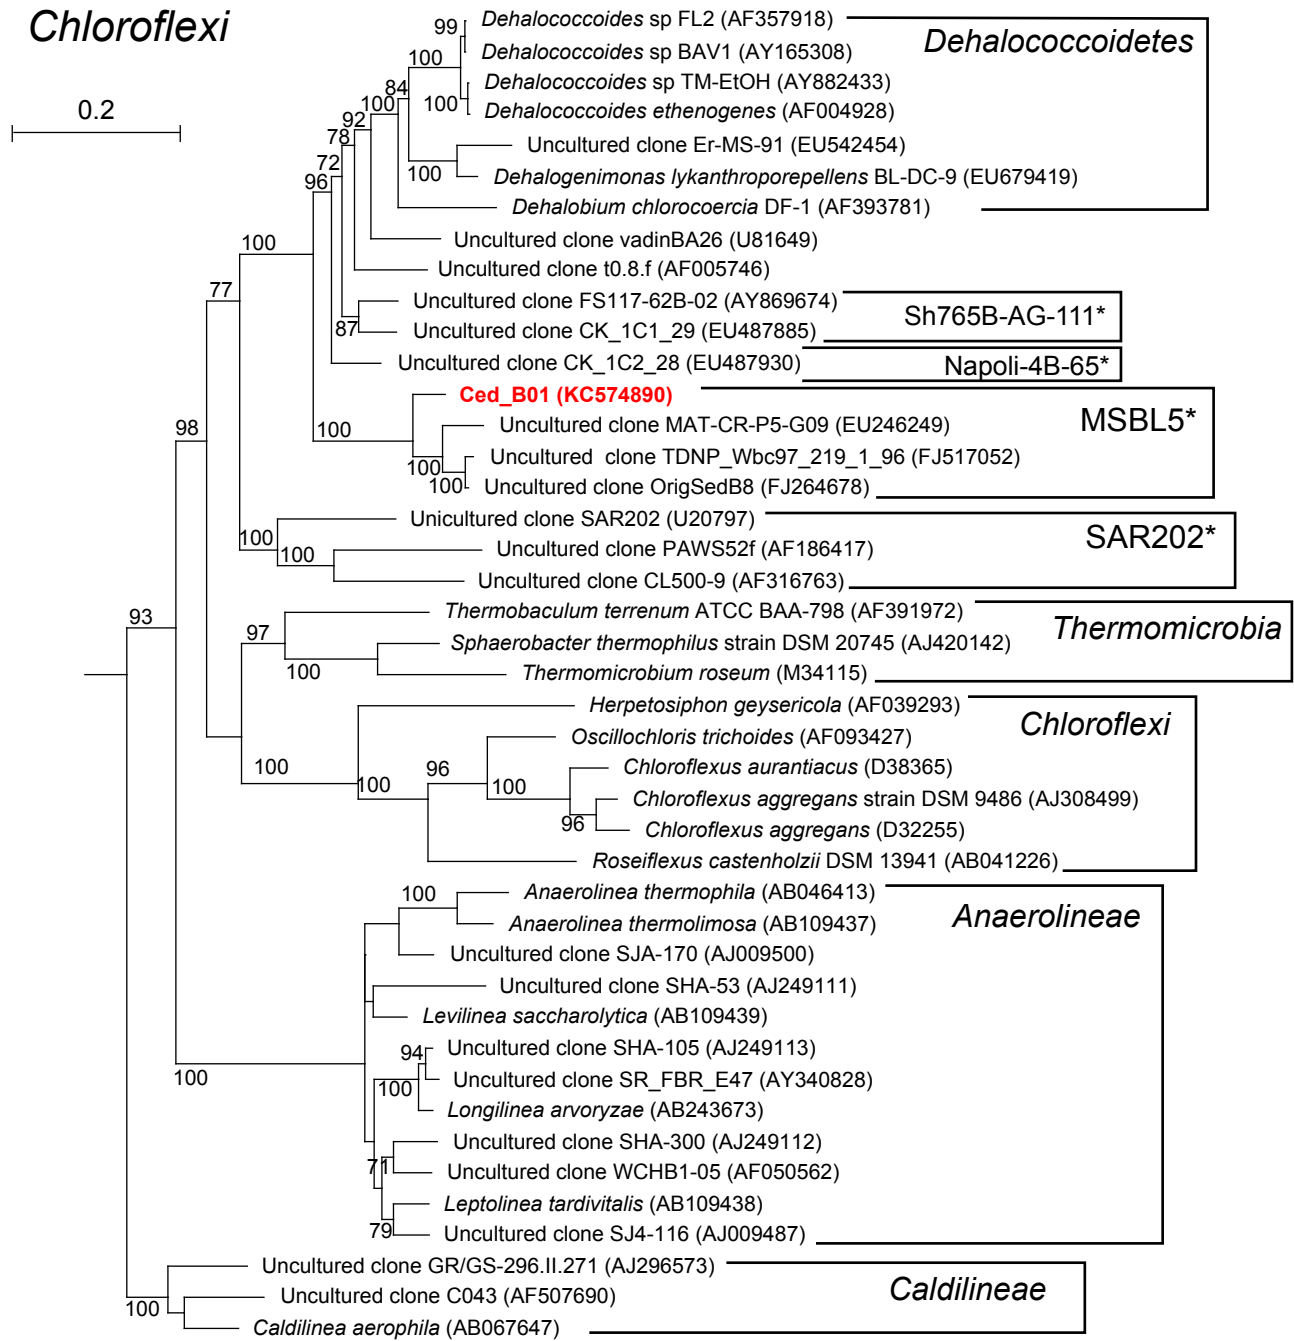

# B. Firmicutes

0.1

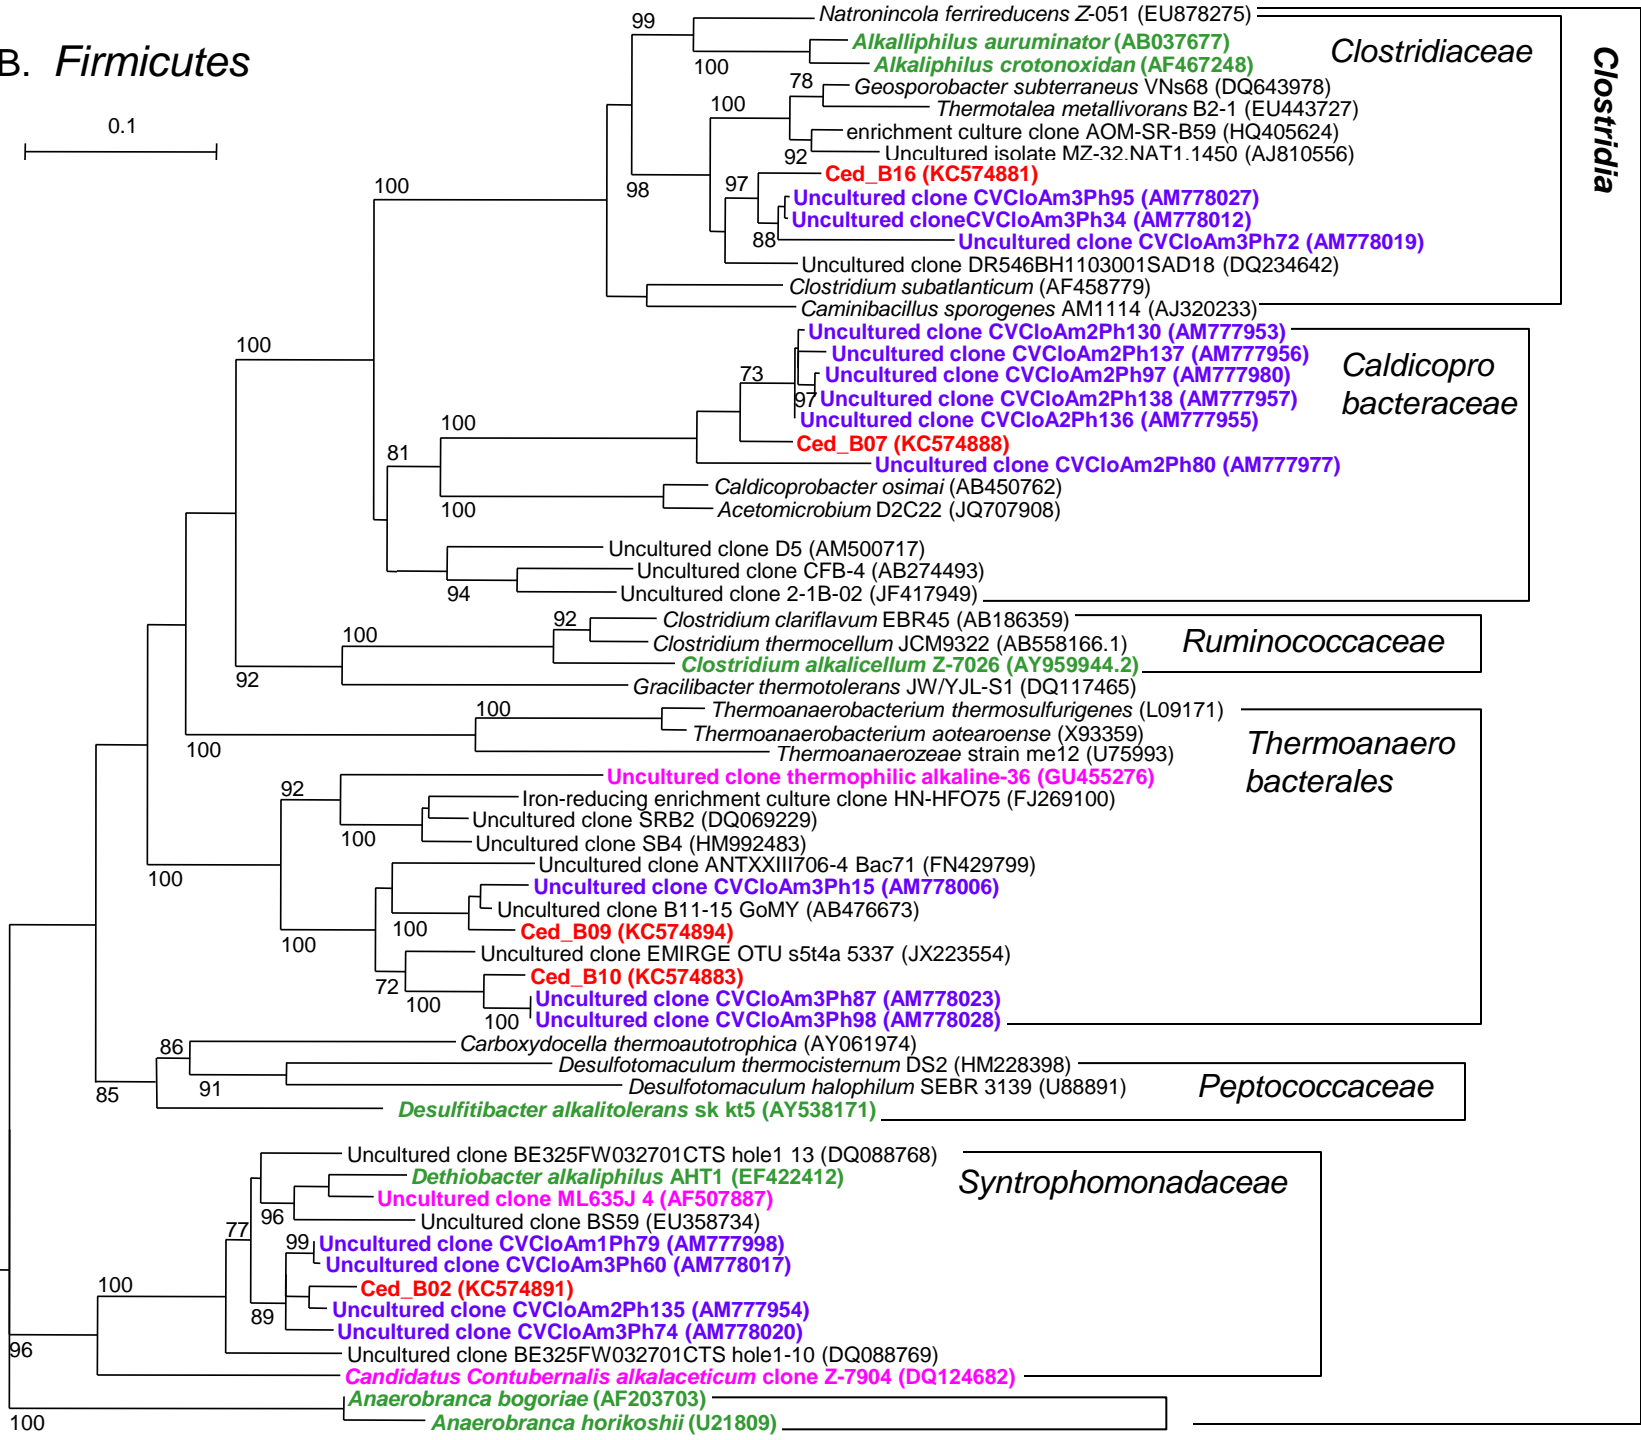

### C. Betaproteobacteria

0.1

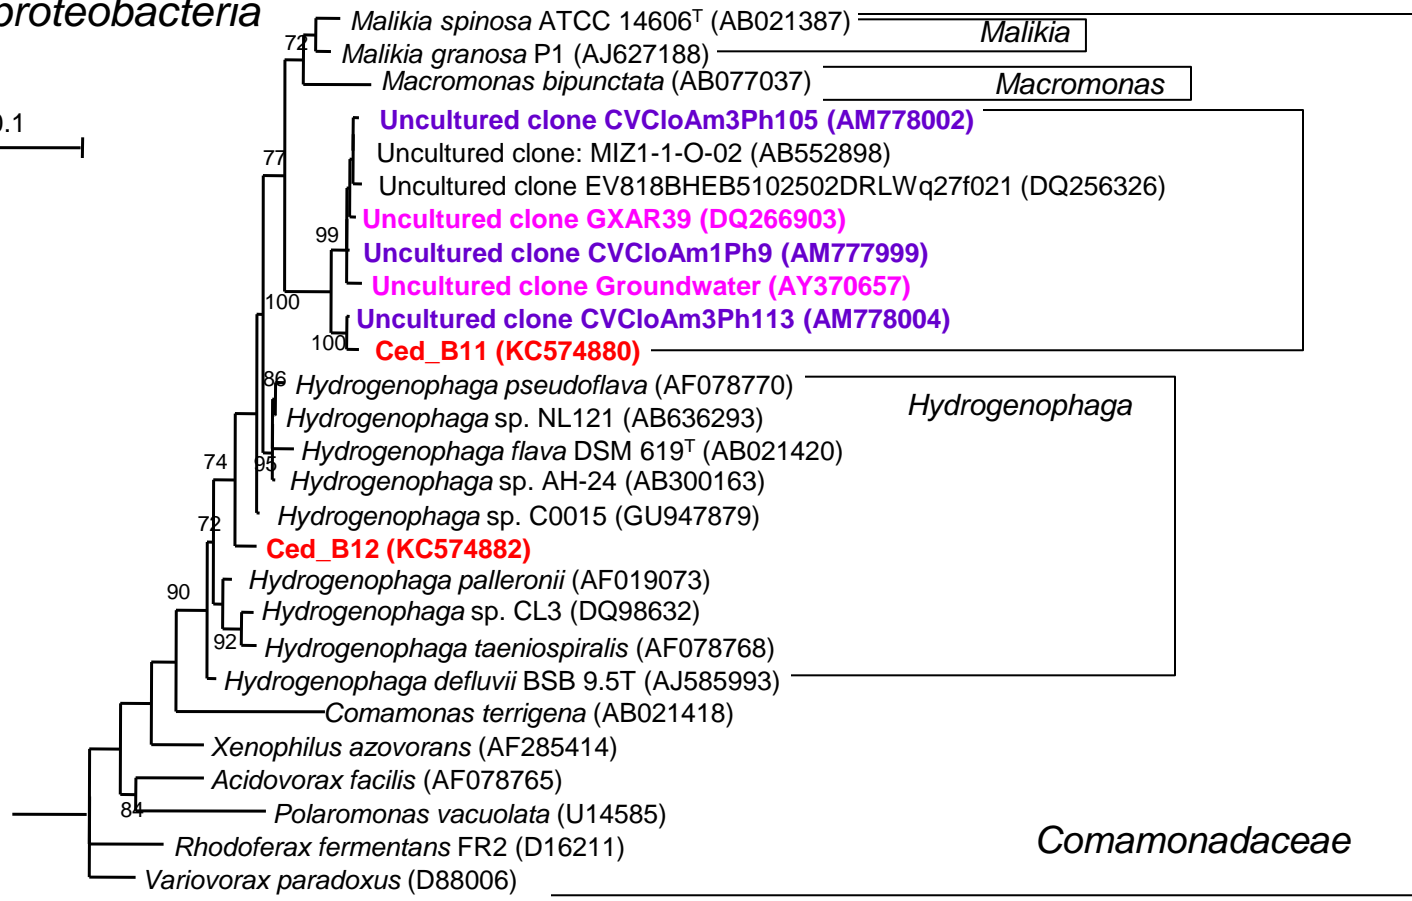

## D. Gammaproteobacteria

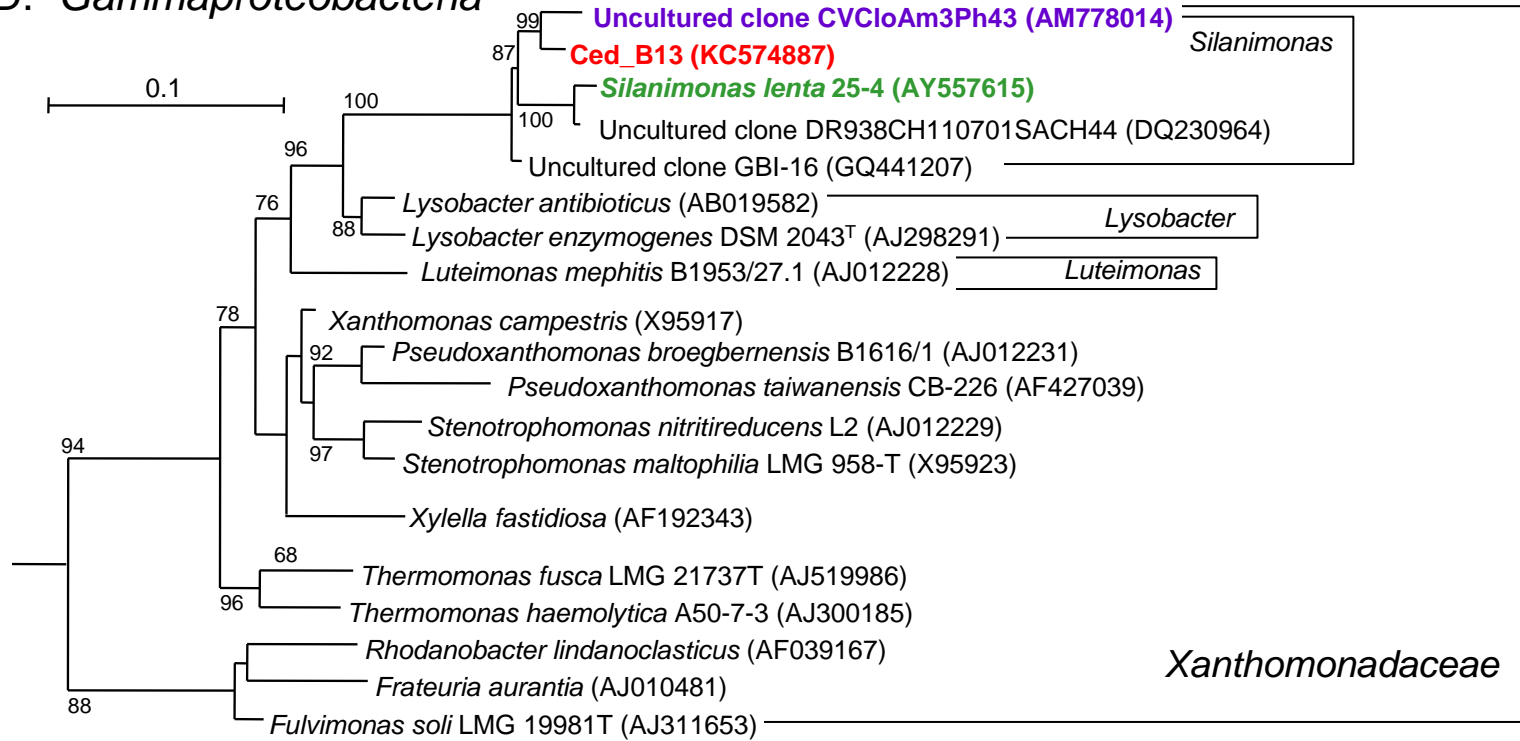

## E. *Deltaproteobacteria*

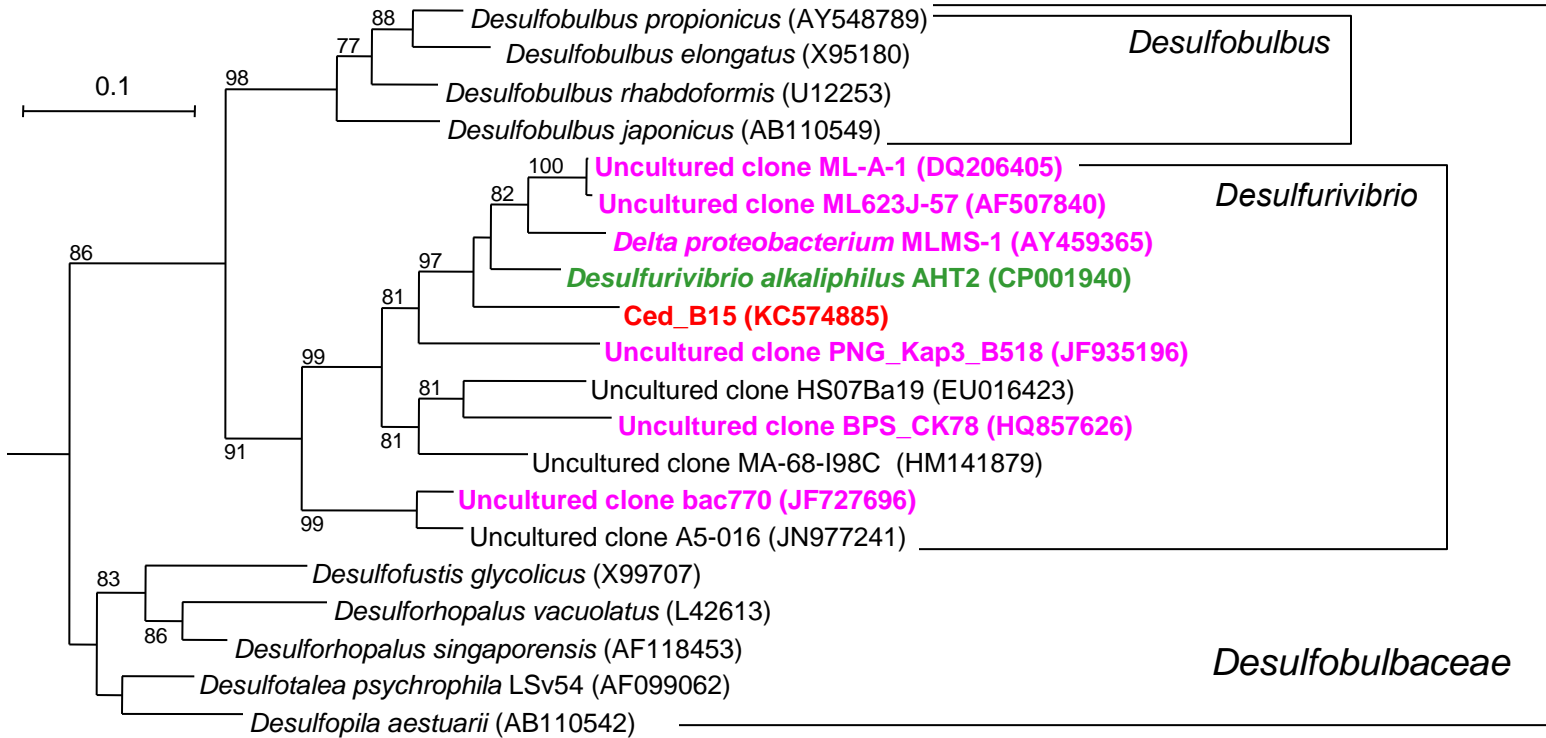

## F. Cyanobacteria

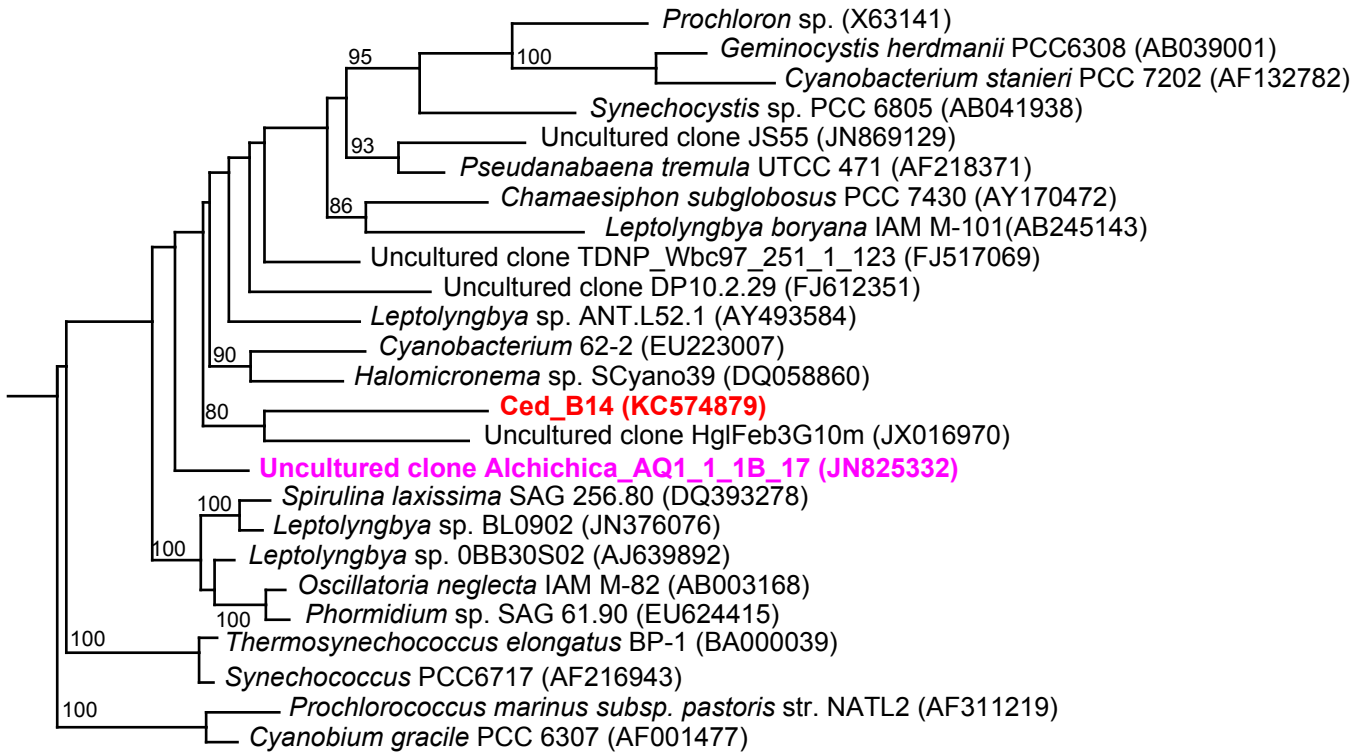

# G. Candidate divisions (Bacteria)

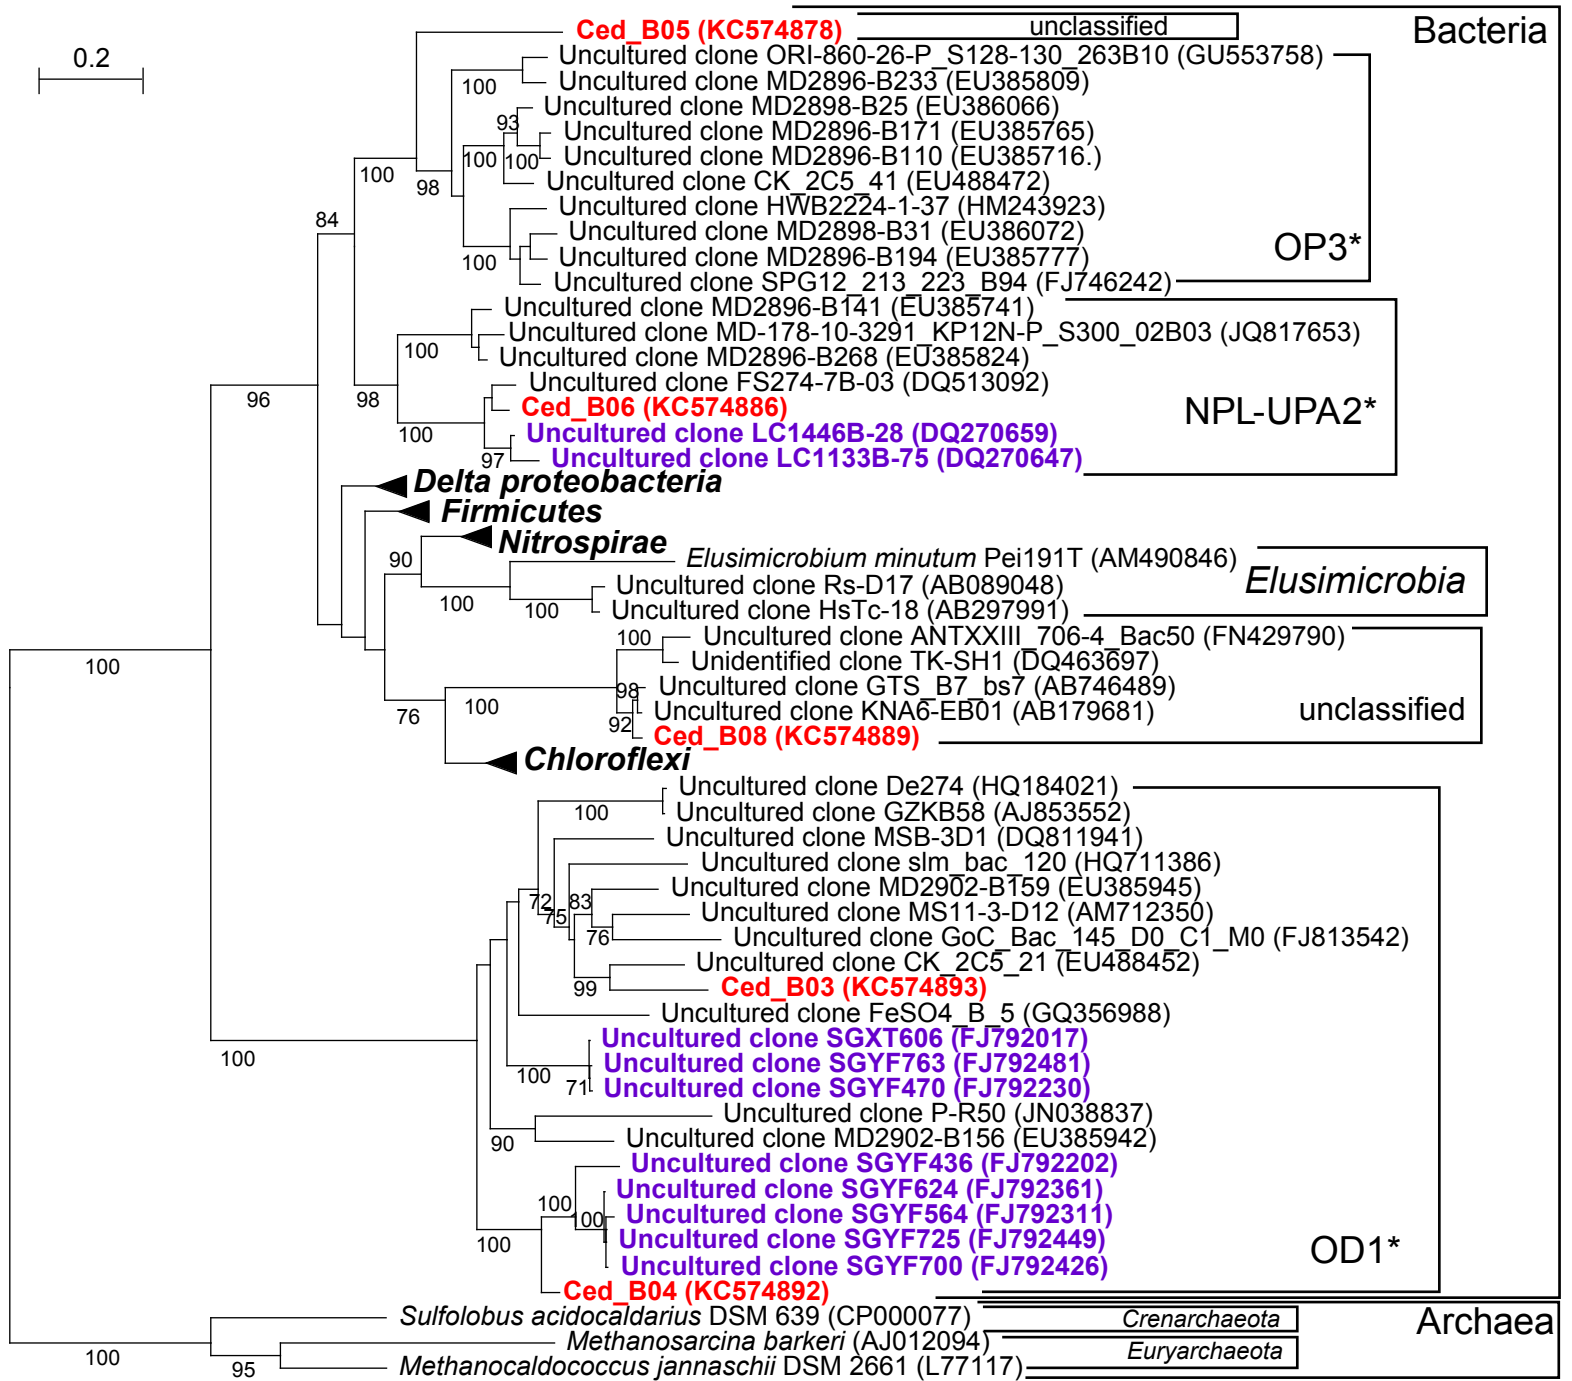

# H. Euryarchaeota

0.1

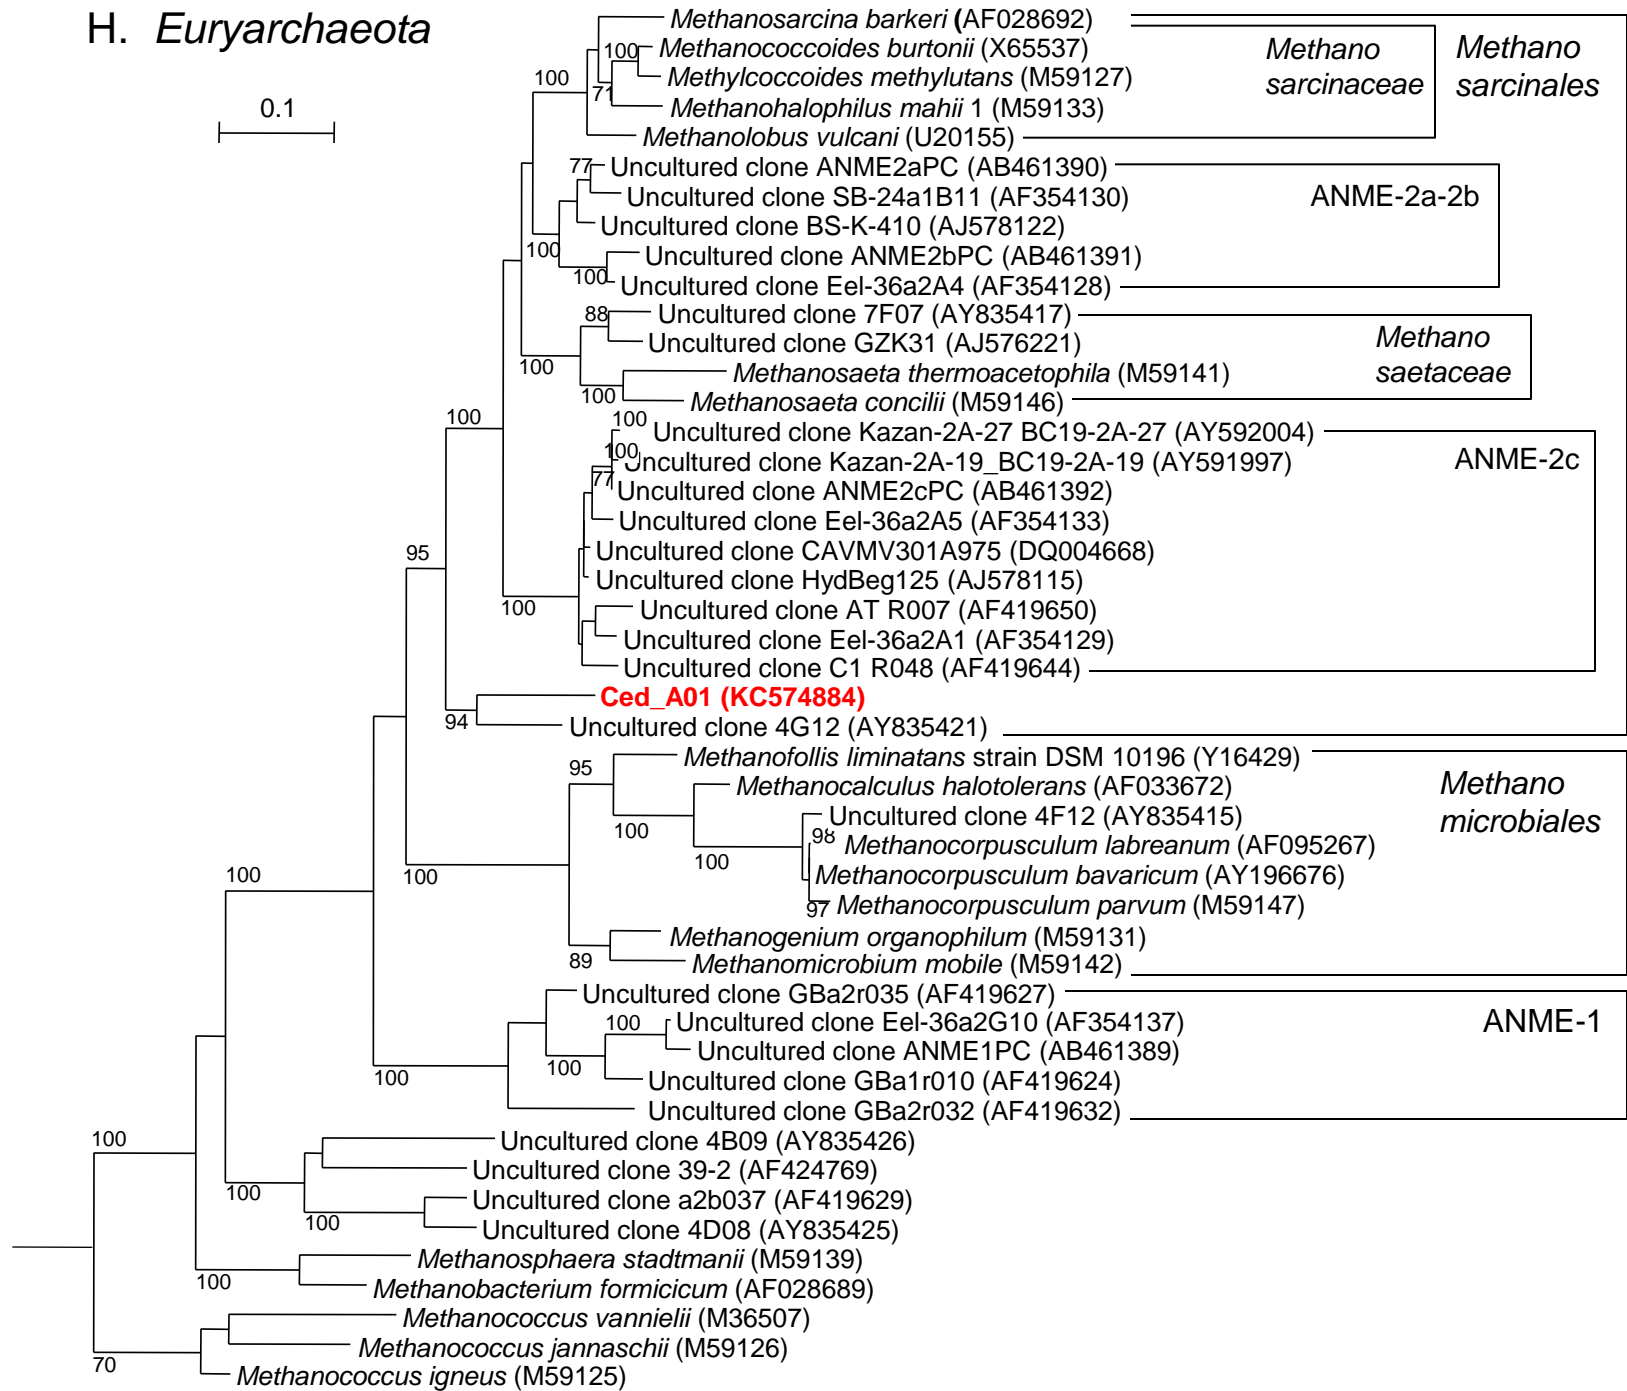

Supplement: 1302426110_sfig05.pdf [file 1302426110_sfig05.pdf]
