# Supplementary material
Source: PubMed Central journal article supplement (PMC3780913)

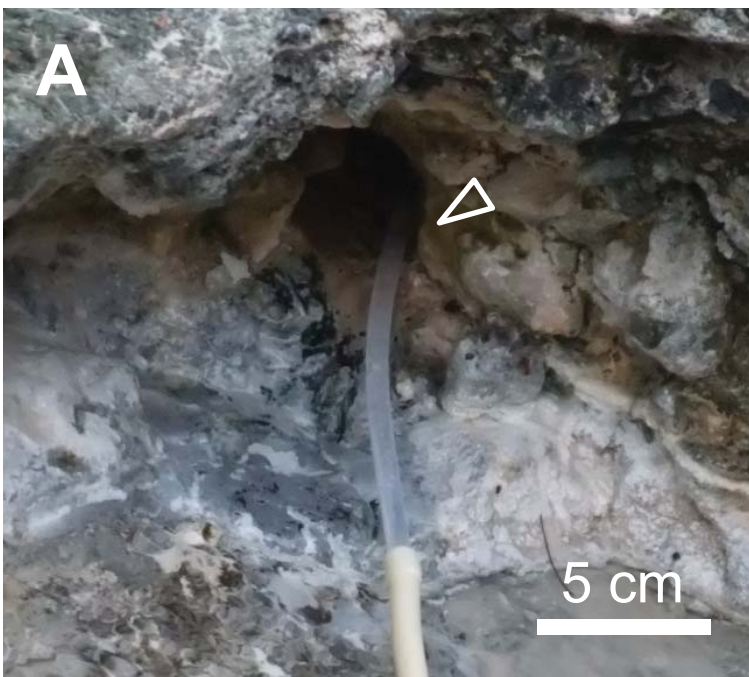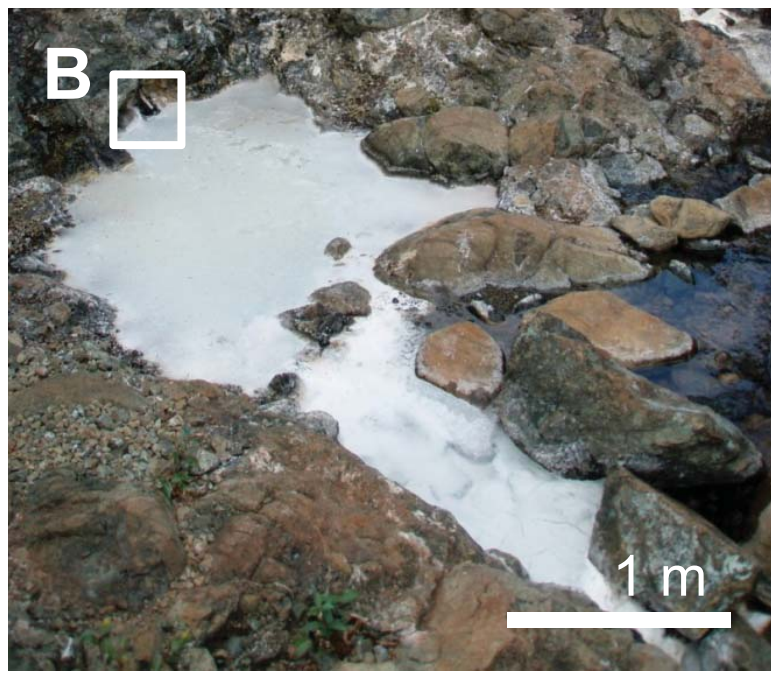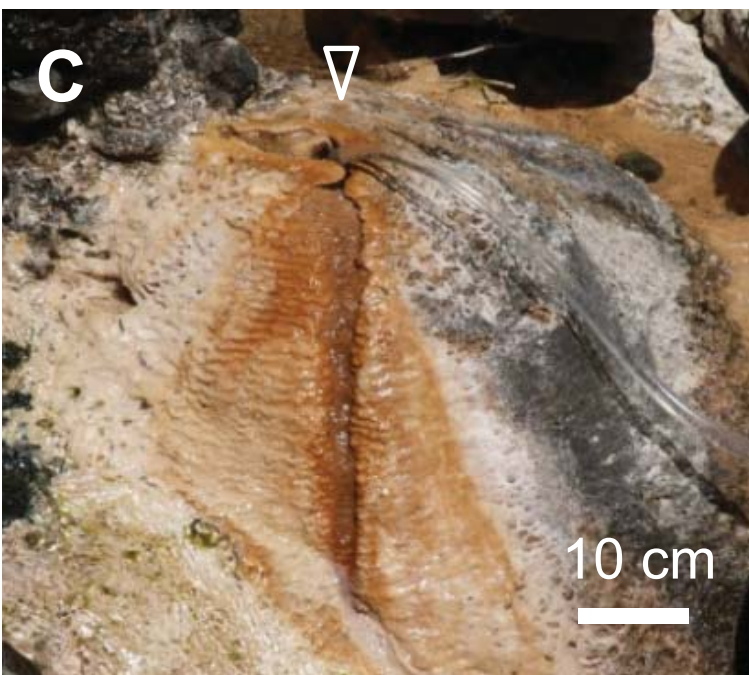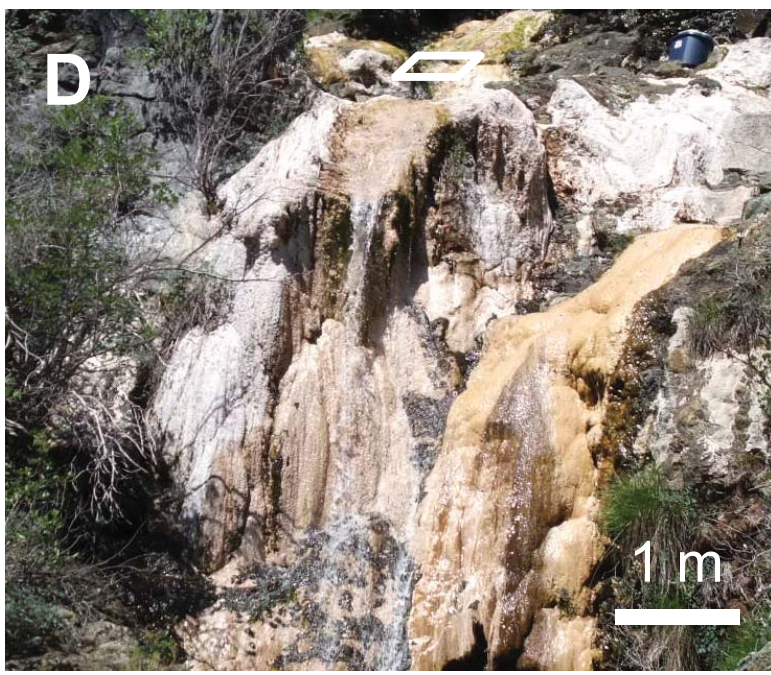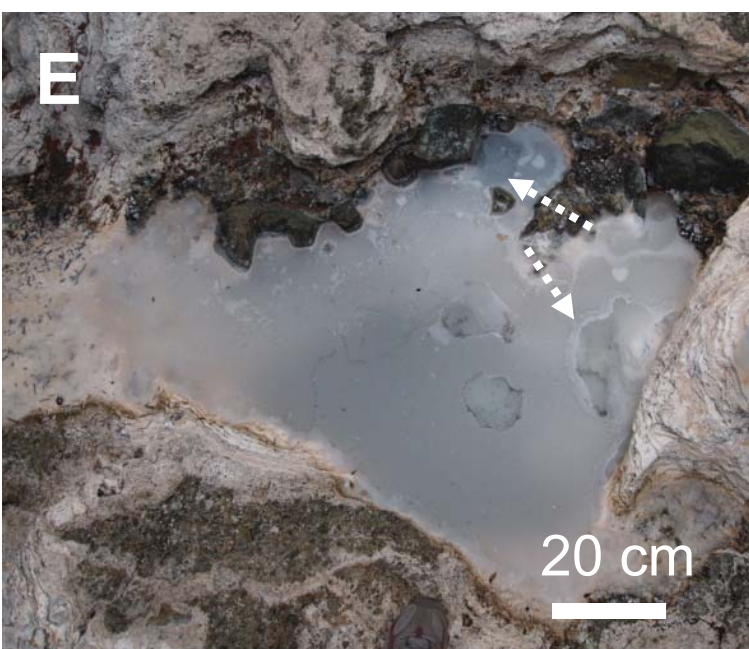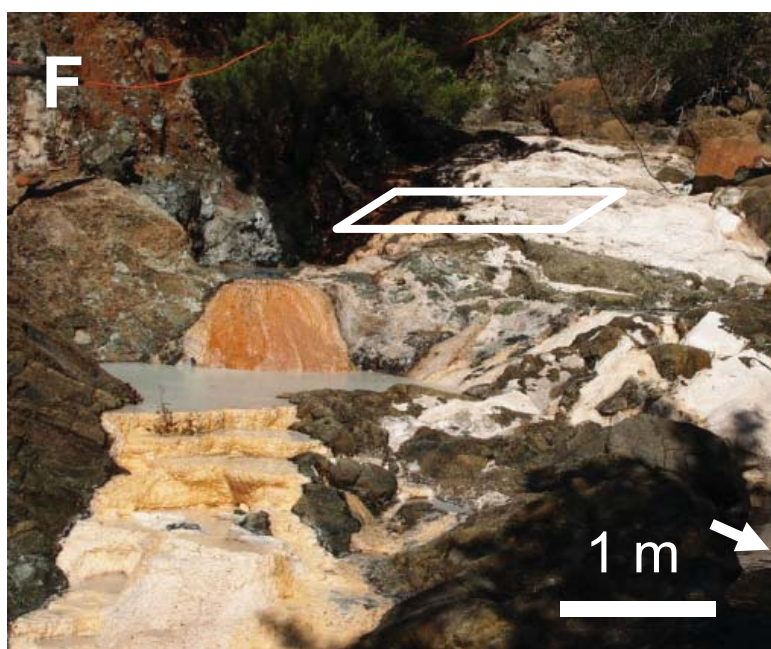

Supplement: 1302426110_sfig01.pdf [file 1302426110_sfig01.pdf]

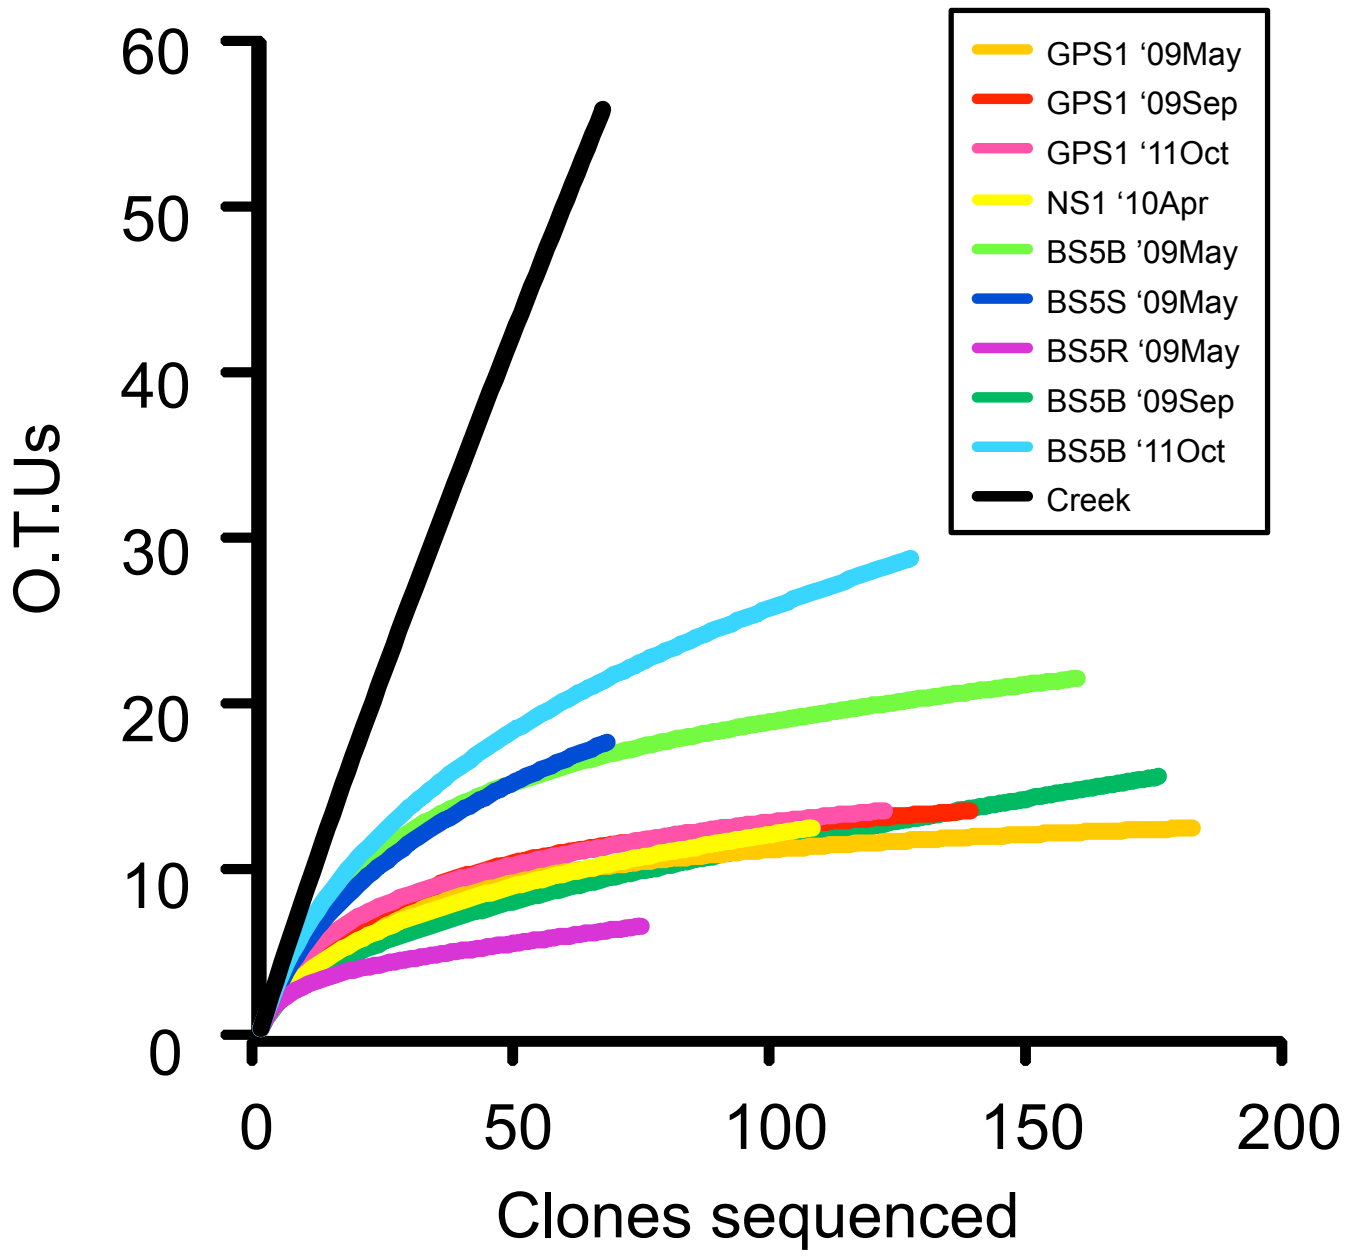

Supplement: 1302426110_sfig02.pdf [file 1302426110_sfig02.pdf]
